# Supplementary material for: Conduction band-edge valley splitting in two-dimensional ferroelectric AgBiP2S6 by magnetic doping: towards electron valley-polarized transport
Source: Royal Society of Chemistry journal article supplement (doi:10.1039/d2ra01697d), 2022-01-01
Supplement: d2ra01697d1.pdf [file d2ra01697d1.pdf]

## Supplementary Information

# Conduction band-edge valley splitting in two-dimensional ferroelectric $\text{AgBiP}_2\text{S}_6$ by magnetic doping: towards electron valley-polarized transport

Dongxue Zhang, Baozeng Zhou\*

*Tianjin Key Laboratory of Film Electronic & Communicate Devices, School of Integrated Circuit  
Science and Engineering, Tianjin University of Technology, Tianjin 300384, China*

\*Corresponding Authors

[baozeng@tju.edu.cn](mailto:baozeng@tju.edu.cn) (B. Zhou)

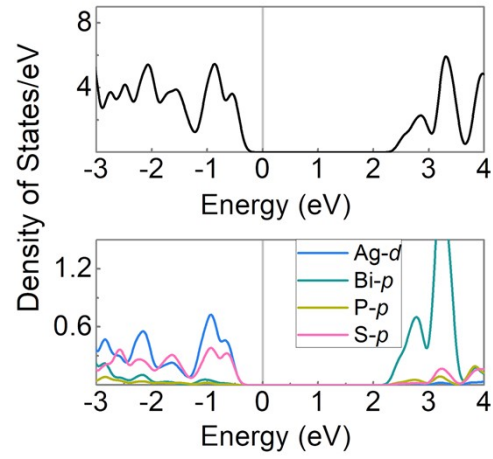

**Fig. S1.** The total DOS and orbital-resolved PDOS for each atom of  $\text{AgBiP}_2\text{S}_6$  monolayer calculated by the HSE06 method. The Fermi level is set to zero.

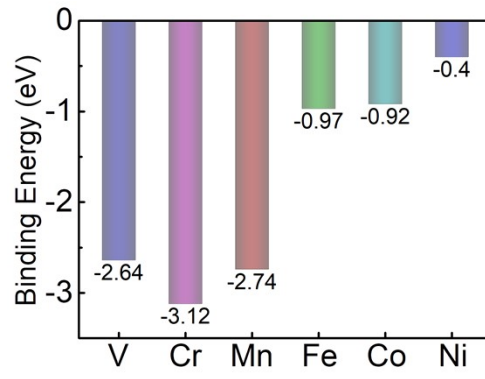

**Fig. S2.** Calculated binding energies of TM-doped AgBiP<sub>2</sub>S<sub>6</sub> monolayers.

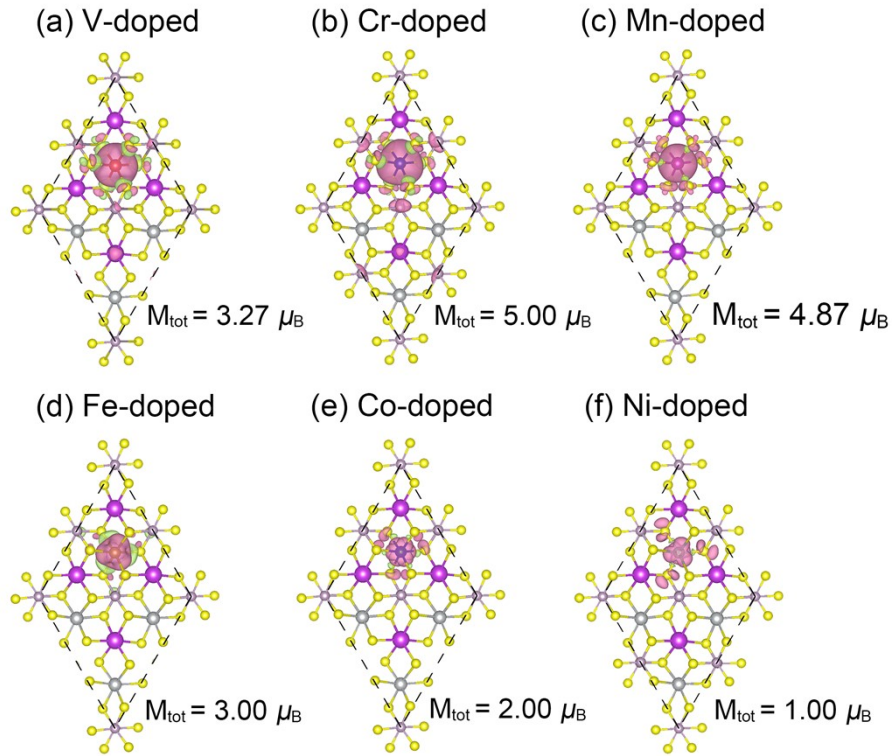

**Fig. S3.** (a)-(f) Spin charge density of TM-doped  $\text{AgBiP}_2\text{S}_6$  monolayers. The pink and green isosurfaces correspond to the spin-up and spin-down states, respectively. The isosurface value is set to 0.001 spins per bohr<sup>3</sup>.

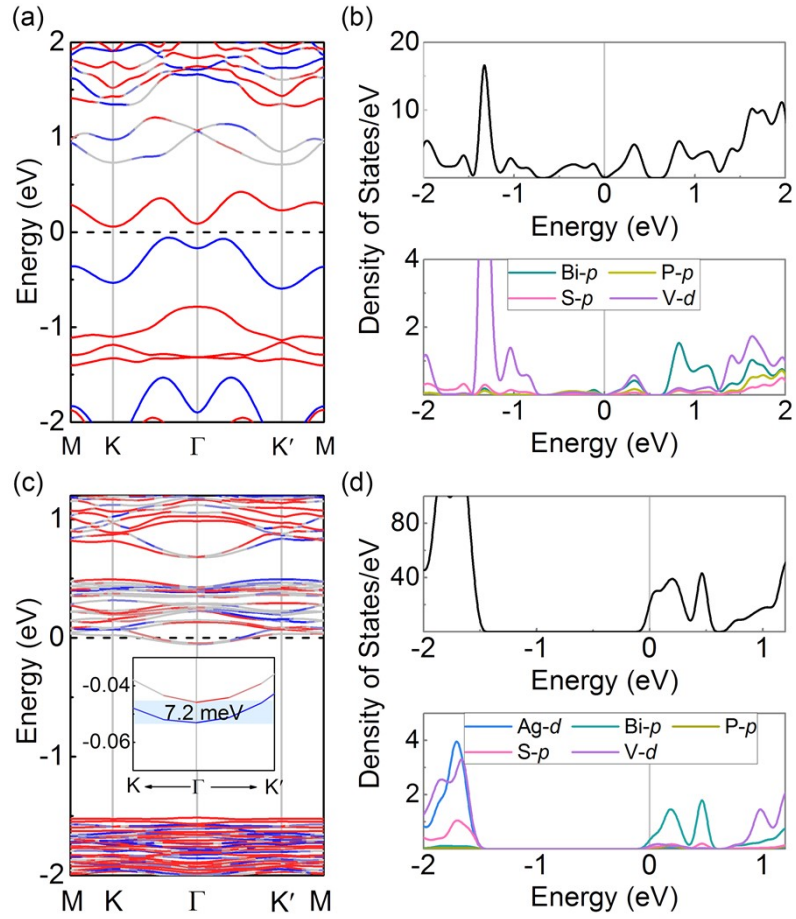

**Fig. S4.** Band structures and orbital-resolved PDOS with SOC for (a)-(b) VBiP<sub>2</sub>S<sub>6</sub> with a doping concentration of 100% and (c)-(d) V-doped AgBiP<sub>2</sub>S<sub>6</sub> with a doping concentration of 11% in a 3×3 supercell. The spin projections along *z* direction are represented by red and blue lines, which represent opposite spin states, respectively.

**Table S1.** The lattice vectors and fractional coordinates of each atom in V-doped AgBiP<sub>2</sub>S<sub>6</sub>.

|             |                     |                     |                     |
|-------------|---------------------|---------------------|---------------------|
| <b>a[Å]</b> | 12.8657064901794609 | 0.0000000494359845  | 0.0000000000000000  |
| <b>b[Å]</b> | -6.4328532879025531 | 11.1420286334117531 | 0.0000000000000000  |
| <b>c[Å]</b> | 0.0000000000000000  | 0.0000000000000000  | 23.5874996185000008 |
| <b>S</b>    | 0.6548579463045473  | 0.4890883335481567  | 0.5098919639639460  |
| <b>S</b>    | 0.8342303872436092  | 0.3451420536954523  | 0.5098919639639460  |
| <b>S</b>    | 0.5109116664518439  | 0.1657696127563913  | 0.5098919639639460  |
| <b>S</b>    | 0.3436823654019980  | 0.4850030974970416  | 0.6501268895179962  |
| <b>S</b>    | 0.1413207320950434  | 0.6563176345980026  | 0.6501268895179962  |
| <b>S</b>    | 0.5149969025029590  | 0.8586792679049564  | 0.6501268895179962  |
| <b>S</b>    | 0.3509391446914708  | 0.3462438974561883  | 0.5030093846765581  |
| <b>S</b>    | 0.9953047527647176  | 0.6490608553085297  | 0.5030093846765581  |
| <b>S</b>    | 0.6537561025438117  | 0.0046952472352823  | 0.5030093846765581  |
| <b>S</b>    | 0.6457410784324674  | 0.6505358500755355  | 0.6529043810238895  |
| <b>S</b>    | 0.0047947716430678  | 0.3542589215675322  | 0.6529043810238895  |
| <b>S</b>    | 0.3494641499244646  | 0.9952052283569317  | 0.6529043810238895  |
| <b>S</b>    | 0.5035458314862133  | 0.6470980912860445  | 0.5047630211356137  |
| <b>S</b>    | 0.1435522597998370  | 0.4964541685137860  | 0.5047630211356137  |
| <b>S</b>    | 0.3529019087139565  | 0.8564477402001627  | 0.5047630211356137  |
| <b>S</b>    | 0.5118801504136585  | 0.3452378187526849  | 0.6480150927384950  |
| <b>S</b>    | 0.8333576683390187  | 0.4881198495863416  | 0.6480150927384950  |
| <b>S</b>    | 0.6547621812473159  | 0.1666423316609738  | 0.6480150927384950  |
| <b>S</b>    | 0.1520587767200111  | 0.0011045934964447  | 0.5004077590839414  |
| <b>S</b>    | 0.8490458167764340  | 0.8479412232799883  | 0.5004077590839414  |
| <b>S</b>    | 0.9988954065035550  | 0.1509541832235663  | 0.5004077590839414  |
| <b>S</b>    | 0.8412909907350090  | 0.9849479397359679  | 0.6473957900745945  |
| <b>S</b>    | 0.1436569490009584  | 0.1587090092649906  | 0.6473957900745945  |
| <b>S</b>    | 0.0150520602640324  | 0.8563430509990417  | 0.6473957900745945  |
| <b>P</b>    | 0.5010814780799095  | 0.4963641483020060  | 0.6265499619854570  |
| <b>P</b>    | -0.0047173297779032 | 0.4989185219200908  | 0.6265499619854570  |
| <b>P</b>    | 0.5036358516979937  | 0.0047173297779031  | 0.6265499619854570  |
| <b>P</b>    | 0.5008946427396375  | 0.4947008668427069  | 0.5309127319758677  |
| <b>P</b>    | -0.0061937758969303 | 0.4991053572603626  | 0.5309127319758677  |
| <b>P</b>    | 0.5052991331572937  | 0.0061937758969303  | 0.5309127319758677  |
| <b>P</b>    | 0.0000000000000000  | 0.0000000000000000  | 0.6225475709000117  |
| <b>P</b>    | 0.0000000000000000  | 0.0000000000000000  | 0.5255978598021375  |
| <b>Ag</b>   | 0.1652537608570578  | 0.3338877729295850  | 0.5674708496970583  |
| <b>Ag</b>   | 0.1686340120725274  | 0.8347462391429427  | 0.5674708496970583  |
| <b>Ag</b>   | 0.6661122270704145  | 0.8313659879274724  | 0.5674708496970583  |
| <b>Bi</b>   | 0.3263136704603770  | 0.1605544107509745  | 0.5795206841507511  |
| <b>Bi</b>   | 0.8342407402905977  | 0.6736863295396228  | 0.5795206841507511  |
| <b>Bi</b>   | 0.8394455892490258  | 0.1657592597094027  | 0.5795206841507511  |
| <b>Bi</b>   | 0.3333333333333357  | 0.6666666666666643  | 0.5805803090938907  |
| <b>V</b>    | 0.6666666666666643  | 0.3333333333333357  | 0.5788488941314359  |

**Table S2.** The lattice vectors and fractional coordinates of each atom in Cr-doped AgBiP<sub>2</sub>S<sub>6</sub>.

|             |                     |                     |                     |
|-------------|---------------------|---------------------|---------------------|
| <b>a[Å]</b> | 12.8765087487423333 | 0.0000000093358572  | 0.0000000000000000  |
| <b>b[Å]</b> | -6.4382543824562539 | 11.1513836837954994 | 0.0000000000000000  |
| <b>c[Å]</b> | 0.0000000000000000  | 0.0000000000000000  | 23.5874996185000008 |
| <b>S</b>    | 0.6518044905784184  | 0.4954822902703230  | 0.5076677195835120  |
| <b>S</b>    | 0.8436777996919046  | 0.3481955094215816  | 0.5076677195835120  |
| <b>S</b>    | 0.5045177097296766  | 0.1563222003080952  | 0.5076677195835120  |
| <b>S</b>    | 0.3412565797144544  | 0.4872796018900415  | 0.6500050593964282  |
| <b>S</b>    | 0.1460230221755870  | 0.6587434202855457  | 0.6500050593964282  |
| <b>S</b>    | 0.5127203981099585  | 0.8539769778244131  | 0.6500050593964282  |
| <b>S</b>    | 0.3503038282465109  | 0.3435671376664864  | 0.5048514918290654  |
| <b>S</b>    | 0.9932633094199756  | 0.6496961717534893  | 0.5048514918290654  |
| <b>S</b>    | 0.6564328623335133  | 0.0067366905800242  | 0.5048514918290654  |
| <b>S</b>    | 0.6442447341818026  | 0.6595605603296201  | 0.6501113742832596  |
| <b>S</b>    | 0.0153158261478177  | 0.3557552658181976  | 0.6501113742832596  |
| <b>S</b>    | 0.3404394396703798  | 0.9846841738521821  | 0.6501113742832596  |
| <b>S</b>    | 0.4944003319487371  | 0.6449738052166042  | 0.5029469244820770  |
| <b>S</b>    | 0.1505734732678744  | 0.5055996680512628  | 0.5029469244820770  |
| <b>S</b>    | 0.3550261947833954  | 0.8494265267321256  | 0.5029469244820770  |
| <b>S</b>    | 0.5144400500028056  | 0.3562822539090889  | 0.6503868961097434  |
| <b>S</b>    | 0.8418422039062771  | 0.4855599499971942  | 0.6503868961097434  |
| <b>S</b>    | 0.6437177460909106  | 0.1581577960937167  | 0.6503868961097434  |
| <b>S</b>    | 0.1554201113393837  | 0.0087074368354885  | 0.5036391164554682  |
| <b>S</b>    | 0.8532873254961046  | 0.8445798886606167  | 0.5036391164554682  |
| <b>S</b>    | 0.9912925631645116  | 0.1467126745038951  | 0.5036391164554682  |
| <b>S</b>    | 0.8416835671983781  | 0.9863200329458471  | 0.6496847010803063  |
| <b>S</b>    | 0.1446364657474685  | 0.1583164328016217  | 0.6496847010803063  |
| <b>S</b>    | 0.0136799670541533  | 0.8553635342525315  | 0.6496847010803063  |
| <b>P</b>    | 0.4996071519912832  | 0.5013293685852425  | 0.6265429521757551  |
| <b>P</b>    | 0.0017222165939591  | 0.5003928480087166  | 0.6265429521757551  |
| <b>P</b>    | 0.4986706314147575  | -0.0017222165939590 | 0.6265429521757551  |
| <b>P</b>    | 0.4997176694422530  | 0.4973979616083969  | 0.5306120249916005  |
| <b>P</b>    | -0.0023197078338561 | 0.5002823305577468  | 0.5306120249916005  |
| <b>P</b>    | 0.5026020383916034  | 0.0023197078338561  | 0.5306120249916005  |
| <b>P</b>    | 0.0000000000000000  | 0.0000000000000000  | 0.6260582207753019  |
| <b>P</b>    | 0.0000000000000000  | 0.0000000000000000  | 0.5301325950657436  |
| <b>Ag</b>   | 0.1648303277197019  | 0.3346759113259439  | 0.5593691725127840  |
| <b>Ag</b>   | 0.1698455836062417  | 0.8351696722802979  | 0.5593691725127840  |
| <b>Ag</b>   | 0.6653240886740565  | 0.8301544163937584  | 0.5593691725127840  |
| <b>Bi</b>   | 0.3338054494605605  | 0.1664295387806212  | 0.5829379439346909  |
| <b>Bi</b>   | 0.8326240893200607  | 0.6661945505394391  | 0.5829379439346909  |
| <b>Bi</b>   | 0.8335704612193788  | 0.1673759106799393  | 0.5829379439346909  |
| <b>Bi</b>   | 0.3333333333333357  | 0.6666666666666643  | 0.5814855125950904  |
| <b>Cr</b>   | 0.6666666666666643  | 0.3333333333333357  | 0.5765377050597672  |

**Table S3.** The lattice vectors and fractional coordinates of each atom in Mn-doped AgBiP<sub>2</sub>S<sub>6</sub>.

|             |                     |                     |                     |
|-------------|---------------------|---------------------|---------------------|
| <b>a[Å]</b> | 12.8819772003869577 | 0.0000001144619014  | 0.0000000000000000  |
| <b>b[Å]</b> | -6.4409886993204415 | 11.1561194492761206 | 0.0000000000000000  |
| <b>c[Å]</b> | 0.0000000000000000  | 0.0000000000000000  | 23.5874996185000008 |
| <b>S</b>    | 0.6469008805739721  | 0.4855862928667921  | 0.5109674274186964  |
| <b>S</b>    | 0.8386854122928209  | 0.3530991194260364  | 0.5109674274186964  |
| <b>S</b>    | 0.5144137071332072  | 0.1613145877071717  | 0.5109674274186964  |
| <b>S</b>    | 0.3430844230381752  | 0.4863674530247554  | 0.6538151217106818  |
| <b>S</b>    | 0.1432830299865800  | 0.6569155769618251  | 0.6538151217106818  |
| <b>S</b>    | 0.5136325469752434  | 0.8567169700134206  | 0.6538151217106818  |
| <b>S</b>    | 0.3447777024432620  | 0.3464020911585713  | 0.5061126708509756  |
| <b>S</b>    | 0.0016243887153017  | 0.6552222975567379  | 0.5061126708509756  |
| <b>S</b>    | 0.6535979088414371  | 0.9983756112846998  | 0.5061126708509756  |
| <b>S</b>    | 0.6463776422807602  | 0.6503693283819948  | 0.6543344151824433  |
| <b>S</b>    | 0.0039916861012355  | 0.3536223577192560  | 0.6543344151824433  |
| <b>S</b>    | 0.3496306716180052  | 0.9960083138987635  | 0.6543344151824433  |
| <b>S</b>    | 0.4991240902461621  | 0.6465224393319368  | 0.5079290804321145  |
| <b>S</b>    | 0.1473983490857827  | 0.5008759097538322  | 0.5079290804321145  |
| <b>S</b>    | 0.3534775606680634  | 0.8526016509142155  | 0.5079290804321145  |
| <b>S</b>    | 0.5071912259759351  | 0.3451597169682867  | 0.6509709772614266  |
| <b>S</b>    | 0.8379684909923302  | 0.4928087740240663  | 0.6509709772614266  |
| <b>S</b>    | 0.6548402830317145  | 0.1620315090076556  | 0.6509709772614266  |
| <b>S</b>    | 0.1559555392427779  | 0.0093761871416233  | 0.4928815435442174  |
| <b>S</b>    | 0.8534206478988532  | 0.8440444607572238  | 0.4928815435442174  |
| <b>S</b>    | 0.9906238128583759  | 0.1465793521011547  | 0.4928815435442174  |
| <b>S</b>    | 0.8407603888452931  | 0.9821614414942105  | 0.6407665771564813  |
| <b>S</b>    | 0.1414010526489264  | 0.1592396111547141  | 0.6407665771564813  |
| <b>S</b>    | 0.0178385585057812  | 0.8585989473510677  | 0.6407665771564813  |
| <b>P</b>    | 0.4992469226416565  | 0.4965847595806134  | 0.6296279905034782  |
| <b>P</b>    | 0.9973378369389583  | 0.5007530773583350  | 0.6296279905034782  |
| <b>P</b>    | 0.5034152404193725  | 0.0026621630610434  | 0.6296279905034782  |
| <b>P</b>    | 0.4957469874114995  | 0.4934356454837528  | 0.5338492398426491  |
| <b>P</b>    | 0.9976886580722594  | 0.5042530125884999  | 0.5338492398426491  |
| <b>P</b>    | 0.5065643545162503  | 0.0023113419277401  | 0.5338492398426491  |
| <b>P</b>    | 0.0000000000000000  | 0.0000000000000000  | 0.6144864452078636  |
| <b>P</b>    | 0.0000000000000000  | 0.0000000000000000  | 0.5170515653975373  |
| <b>Ag</b>   | 0.1439276062965507  | 0.3225840821372049  | 0.5642433953137675  |
| <b>Ag</b>   | 0.1786564758406470  | 0.8560723937034496  | 0.5642433953137675  |
| <b>Ag</b>   | 0.6774159178628020  | 0.8213435241593448  | 0.5642433953137675  |
| <b>Bi</b>   | 0.3271820304581467  | 0.1573486611825607  | 0.5777525214286943  |
| <b>Bi</b>   | 0.8301666307244114  | 0.6728179695418458  | 0.5777525214286943  |
| <b>Bi</b>   | 0.8426513388174459  | 0.1698333692755795  | 0.5777525214286943  |
| <b>Bi</b>   | 0.3333333333333357  | 0.6666666666666643  | 0.5861009999271635  |
| <b>Mn</b>   | 0.6666666666666643  | 0.3333333333333357  | 0.5861009999271635  |



**Table S4.** The lattice vectors and fractional coordinates of each atom in Fe-doped AgBiP<sub>2</sub>S<sub>6</sub>.

|             |                     |                     |                     |
|-------------|---------------------|---------------------|---------------------|
| <b>a[Å]</b> | 12.8403962079850960 | 0.0000000324739325  | 0.0000000000000000  |
| <b>b[Å]</b> | -6.4201981321157966 | 11.1201092945354958 | 0.0000000000000000  |
| <b>c[Å]</b> | 0.0000000000000000  | 0.0000000000000000  | 23.5874996185000008 |
| <b>S</b>    | 0.6579799124427795  | 0.4958187874722892  | 0.5100461583608371  |
| <b>S</b>    | 0.8378388750295098  | 0.3420200875572207  | 0.5100461583608371  |
| <b>S</b>    | 0.5041812125277110  | 0.1621611249704900  | 0.5100461583608371  |
| <b>S</b>    | 0.3396411933338674  | 0.4844102236293238  | 0.6493647921170059  |
| <b>S</b>    | 0.1447690302954567  | 0.6603588066661330  | 0.6493647921170059  |
| <b>S</b>    | 0.5155897763706765  | 0.8552309697045435  | 0.6493647921170059  |
| <b>S</b>    | 0.3526067386869859  | 0.3423967443857850  | 0.5042803553864217  |
| <b>S</b>    | 0.9897900056987995  | 0.6473932613130142  | 0.5042803553864217  |
| <b>S</b>    | 0.6576032556142155  | 0.0102099943012010  | 0.5042803553864217  |
| <b>S</b>    | 0.6423255665289895  | 0.6549409644051003  | 0.6520680923527107  |
| <b>S</b>    | 0.0126153978761110  | 0.3576744334710110  | 0.6520680923527107  |
| <b>S</b>    | 0.3450590355948997  | 0.9873846021238892  | 0.6520680923527107  |
| <b>S</b>    | 0.4972495946792806  | 0.6451433557988845  | 0.5041269540335553  |
| <b>S</b>    | 0.1478937611196109  | 0.5027504053207191  | 0.5041269540335553  |
| <b>S</b>    | 0.3548566442011155  | 0.8521062388803895  | 0.5041269540335553  |
| <b>S</b>    | 0.5137224856669623  | 0.3514162641976066  | 0.6496130791804923  |
| <b>S</b>    | 0.8376937785306362  | 0.4862775143330370  | 0.6496130791804923  |
| <b>S</b>    | 0.6485837358023933  | 0.1623062214693563  | 0.6496130791804923  |
| <b>S</b>    | 0.1546487937793268  | 0.0067277890304844  | 0.5030474739677105  |
| <b>S</b>    | 0.8520789952511577  | 0.8453512062206733  | 0.5030474739677105  |
| <b>S</b>    | 0.9932722109695159  | 0.1479210047488425  | 0.5030474739677105  |
| <b>S</b>    | 0.8393633122063825  | 0.9813030018457031  | 0.6499803466892973  |
| <b>S</b>    | 0.1419396896393204  | 0.1606366877936175  | 0.6499803466892973  |
| <b>S</b>    | 0.0186969981542971  | 0.8580603103606794  | 0.6499803466892973  |
| <b>P</b>    | 0.4989932027496640  | 0.4971868253128228  | 0.6268552792444542  |
| <b>P</b>    | -0.0018063774368409 | 0.5010067972503365  | 0.6268552792444542  |
| <b>P</b>    | 0.5028131746871775  | 0.0018063774368409  | 0.6268552792444542  |
| <b>P</b>    | 0.5009084593301675  | 0.4957678432515651  | 0.5313091284523211  |
| <b>P</b>    | -0.0051406160786019 | 0.4990915406698329  | 0.5313091284523211  |
| <b>P</b>    | 0.5042321567484345  | 0.0051406160786021  | 0.5313091284523211  |
| <b>P</b>    | 0.0000000000000000  | 0.0000000000000000  | 0.6260833416580608  |
| <b>P</b>    | 0.0000000000000000  | 0.0000000000000000  | 0.5296336473266550  |
| <b>Ag</b>   | 0.1662424565618629  | 0.3321203992439914  | 0.5603359092879607  |
| <b>Ag</b>   | 0.1658779426821284  | 0.8337575434381365  | 0.5603359092879607  |
| <b>Ag</b>   | 0.6678796007560087  | 0.8341220573178715  | 0.5603359092879607  |
| <b>Bi</b>   | 0.3316480317326824  | 0.1646799828452171  | 0.5838721571136082  |
| <b>Bi</b>   | 0.8330319511125351  | 0.6683519682673175  | 0.5838721571136082  |
| <b>Bi</b>   | 0.8353200171547830  | 0.1669680488874653  | 0.5838721571136082  |
| <b>Bi</b>   | 0.3333333333333357  | 0.6666666666666643  | 0.5817440499993179  |
| <b>Fe</b>   | 0.6666666666666643  | 0.3333333333333357  | 0.5583199464568195  |

**Table S5.** The lattice vectors and fractional coordinates of each atom in Co-doped AgBiP<sub>2</sub>S<sub>6</sub>.

|             |                     |                     |                     |
|-------------|---------------------|---------------------|---------------------|
| <b>a[Å]</b> | 12.7880434369079019 | -0.0000000675790626 | 0.0000000000000000  |
| <b>b[Å]</b> | -6.3940216599287512 | 11.0747705148506732 | 0.0000000000000000  |
| <b>c[Å]</b> | 0.0000000000000000  | 0.0000000000000000  | 23.5874996185000008 |
| <b>S</b>    | 0.6545307394057350  | 0.4884353790987767  | 0.5104101923430600  |
| <b>S</b>    | 0.8339046396930391  | 0.3454692605942710  | 0.5104101923430600  |
| <b>S</b>    | 0.5115646209012245  | 0.1660953603069522  | 0.5104101923430600  |
| <b>S</b>    | 0.3413301487547981  | 0.4842631102584399  | 0.6502066917363674  |
| <b>S</b>    | 0.1429329615036344  | 0.6586698512452008  | 0.6502066917363674  |
| <b>S</b>    | 0.5157368897415598  | 0.8570670384963661  | 0.6502066917363674  |
| <b>S</b>    | 0.3512376526736859  | 0.3445239436344114  | 0.5037532208875319  |
| <b>S</b>    | 0.9932862909607185  | 0.6487623473263128  | 0.5037532208875319  |
| <b>S</b>    | 0.6554760563655880  | 0.0067137090392749  | 0.5037532208875319  |
| <b>S</b>    | 0.6449219257686022  | 0.6528942836044469  | 0.6527978599946804  |
| <b>S</b>    | 0.0079723578358523  | 0.3550780742313989  | 0.6527978599946804  |
| <b>S</b>    | 0.3471057163955533  | 0.9920276421641471  | 0.6527978599946804  |
| <b>S</b>    | 0.5011422918463345  | 0.6472298391034103  | 0.5051780109374990  |
| <b>S</b>    | 0.1460875472570837  | 0.4988577081536592  | 0.5051780109374990  |
| <b>S</b>    | 0.3527701608965971  | 0.8539124527429214  | 0.5051780109374990  |
| <b>S</b>    | 0.5145550640244473  | 0.3477946330789823  | 0.6484132719626460  |
| <b>S</b>    | 0.8332395690545198  | 0.4854449359755442  | 0.6484132719626460  |
| <b>S</b>    | 0.6522053669210178  | 0.1667604309454734  | 0.6484132719626460  |
| <b>S</b>    | 0.1552079577930718  | 0.0068691664272308  | 0.4999055687588259  |
| <b>S</b>    | 0.8516612086341574  | 0.8447920422069283  | 0.4999055687588259  |
| <b>S</b>    | 0.9931308335727621  | 0.1483387913658413  | 0.4999055687588259  |
| <b>S</b>    | 0.8388427183271688  | 0.9809248996750374  | 0.6474850273633138  |
| <b>S</b>    | 0.1420821813478751  | 0.1611572816728380  | 0.6474850273633138  |
| <b>S</b>    | 0.0190751003249629  | 0.8579178186521248  | 0.6474850273633138  |
| <b>P</b>    | 0.5003760343986768  | 0.4961369531177888  | 0.6269390524000670  |
| <b>P</b>    | 0.9957609187191263  | 0.4996239656013224  | 0.6269390524000670  |
| <b>P</b>    | 0.5038630468822044  | 0.0042390812808813  | 0.6269390524000670  |
| <b>P</b>    | 0.5021606028252803  | 0.4953544764715174  | 0.5314944906709872  |
| <b>P</b>    | 0.9931938736462442  | 0.4978393971747200  | 0.5314944906709872  |
| <b>P</b>    | 0.5046455235284888  | 0.0068061263537559  | 0.5314944906709872  |
| <b>P</b>    | 0.0000000000000000  | 0.0000000000000000  | 0.6229525752666047  |
| <b>P</b>    | 0.0000000000000000  | 0.0000000000000000  | 0.5262758174436668  |
| <b>Ag</b>   | 0.1622883058455144  | 0.3275857195668966  | 0.5630168385959219  |
| <b>Ag</b>   | 0.1652974137213824  | 0.8377116941544849  | 0.5630168385959219  |
| <b>Ag</b>   | 0.6724142804331028  | 0.8347025862786189  | 0.5630168385959219  |
| <b>Bi</b>   | 0.3333141748020887  | 0.1650322491778484  | 0.5811167944016155  |
| <b>Bi</b>   | 0.8317180743757651  | 0.6666858251979101  | 0.5811167944016155  |
| <b>Bi</b>   | 0.8349677508221595  | 0.1682819256242334  | 0.5811167944016155  |
| <b>Bi</b>   | 0.3333333333333357  | 0.6666666666666643  | 0.5819487803889790  |
| <b>Co</b>   | 0.6666666666666643  | 0.3333333333333357  | 0.5771519307431562  |

**Table S6.** The lattice vectors and fractional coordinates of each atom in Ni-doped AgBiP<sub>2</sub>S<sub>6</sub>.

|             |                     |                     |                     |
|-------------|---------------------|---------------------|---------------------|
| <b>a[Å]</b> | 12.8451228042110639 | -0.0000002261694508 | 0.0000000000000000  |
| <b>b[Å]</b> | -6.4225612062370354 | 11.1242027762623064 | 0.0000000000000000  |
| <b>c[Å]</b> | 0.0000000000000000  | 0.0000000000000000  | 23.5874996185000008 |
| <b>S</b>    | 0.6564460813090357  | 0.4948107693602374  | 0.5070866601817167  |
| <b>S</b>    | 0.8383646880512028  | 0.3435539186909645  | 0.5070866601817167  |
| <b>S</b>    | 0.5051892306397621  | 0.1616353119487979  | 0.5070866601817167  |
| <b>S</b>    | 0.3387085809695705  | 0.4906022508760313  | 0.6476208068759507  |
| <b>S</b>    | 0.1518936699064607  | 0.6612914190304293  | 0.6476208068759507  |
| <b>S</b>    | 0.5093977491239678  | 0.8481063300935394  | 0.6476208068759507  |
| <b>S</b>    | 0.3504786566645607  | 0.3406336601772803  | 0.5051192065423394  |
| <b>S</b>    | 0.9901550035127198  | 0.6495213433354389  | 0.5051192065423394  |
| <b>S</b>    | 0.6593663398227193  | 0.0098449964872803  | 0.5051192065423394  |
| <b>S</b>    | 0.6416759970833460  | 0.6571880672032888  | 0.6513246066981971  |
| <b>S</b>    | 0.0155120701199436  | 0.3583240029166547  | 0.6513246066981971  |
| <b>S</b>    | 0.3428119327967107  | 0.9844879298800561  | 0.6513246066981971  |
| <b>S</b>    | 0.5004187339654455  | 0.6432840042960900  | 0.5015554191617695  |
| <b>S</b>    | 0.1428652703306516  | 0.4995812660345542  | 0.5015554191617695  |
| <b>S</b>    | 0.3567159957039101  | 0.8571347296693483  | 0.5015554191617695  |
| <b>S</b>    | 0.5079985295646285  | 0.3549626459835969  | 0.6538804528726213  |
| <b>S</b>    | 0.8469641164189611  | 0.4920014704353718  | 0.6538804528726213  |
| <b>S</b>    | 0.6450373540164033  | 0.1530358835810316  | 0.6538804528726213  |
| <b>S</b>    | 0.1541607666043134  | 0.0051815893511293  | 0.5065158526018575  |
| <b>S</b>    | 0.8510208227468156  | 0.8458392333956862  | 0.5065158526018575  |
| <b>S</b>    | 0.9948184106488707  | 0.1489791772531843  | 0.5065158526018575  |
| <b>S</b>    | 0.8427682919595175  | 0.9889621304600609  | 0.6528604183879323  |
| <b>S</b>    | 0.1461938385005428  | 0.1572317080404820  | 0.6528604183879323  |
| <b>S</b>    | 0.0110378695399392  | 0.8538061614994572  | 0.6528604183879323  |
| <b>P</b>    | 0.4973837008751829  | 0.4989804091635743  | 0.6268685627045026  |
| <b>P</b>    | 0.0015967082883915  | 0.5026162991248170  | 0.6268685627045026  |
| <b>P</b>    | 0.5010195908364256  | -0.0015967082883915 | 0.6268685627045026  |
| <b>P</b>    | 0.5000370685340066  | 0.4938997477024863  | 0.5308633614533850  |
| <b>P</b>    | -0.0061373208315210 | 0.4999629314659931  | 0.5308633614533850  |
| <b>P</b>    | 0.5061002522975140  | 0.0061373208315211  | 0.5308633614533850  |
| <b>P</b>    | 0.0000000000000000  | 0.0000000000000000  | 0.6283657443858565  |
| <b>P</b>    | 0.0000000000000000  | 0.0000000000000000  | 0.5323668915432981  |
| <b>Ag</b>   | 0.1668109415629730  | 0.3354290718226154  | 0.5634909141981940  |
| <b>Ag</b>   | 0.1686181302596425  | 0.8331890584370270  | 0.5634909141981940  |
| <b>Ag</b>   | 0.6645709281773848  | 0.8313818697403573  | 0.5634909141981940  |
| <b>Bi</b>   | 0.3349775462683822  | 0.1677366260628877  | 0.5857535157489675  |
| <b>Bi</b>   | 0.8327590797945057  | 0.6650224537316181  | 0.5857535157489675  |
| <b>Bi</b>   | 0.8322633739371121  | 0.1672409202054942  | 0.5857535157489675  |
| <b>Bi</b>   | 0.3333333333333357  | 0.6666666666666643  | 0.5775445360762760  |
| <b>Ni</b>   | 0.6666666666666643  | 0.3333333333333357  | 0.5333836597122509  |
